# Supplementary material
Source: PubMed Central journal article supplement (PMC6610050)
Supplement: ajcr0009-1266-f10.pdf [file ajcr0009-1266-f10.pdf]

## Induction of ER-stress and cytotoxic autophagy

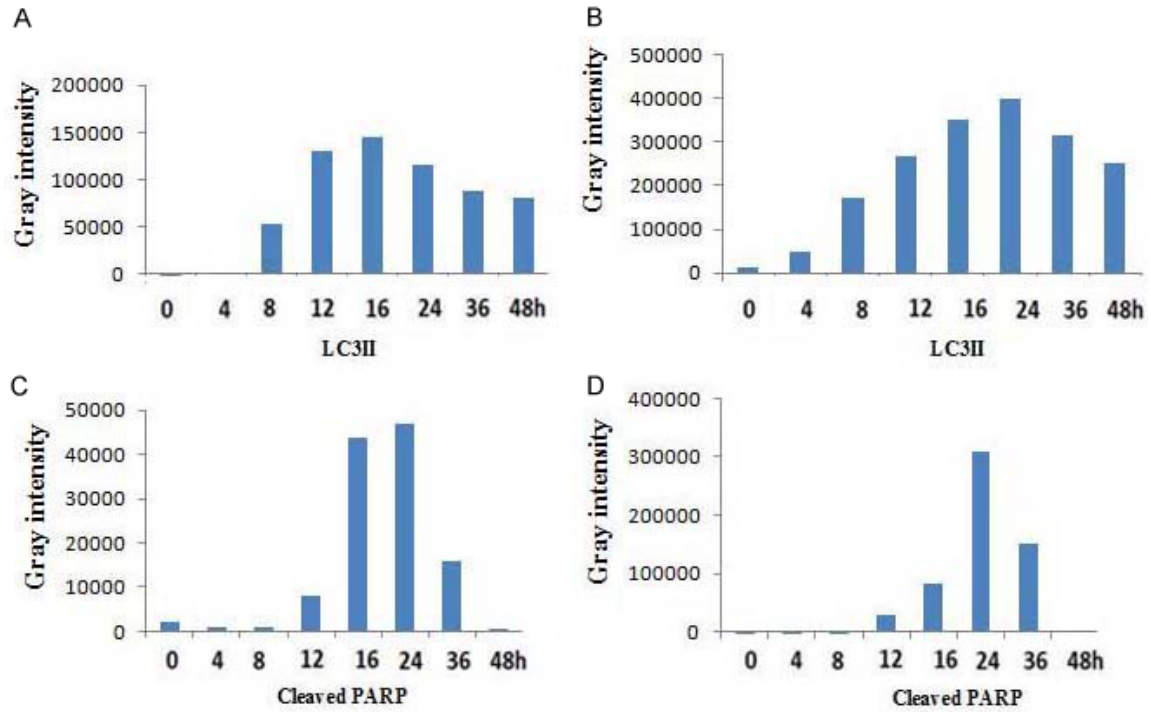

**Figure S1.** DSF/Cu induces *in vitro* autophagy and apoptosis in breast and pancreatic cancer cell lines. The cell lines were treated as indicated. Treated cells were lysed and analyzed by Western blot for expression of cleaved PARP and LC3II/I. The mean gray intensity values for LC3II (UACC-812 - A, PDAC6 - B) or cleaved PARP (UACC-812 - C, PDAC6 - D) were shown.

## Induction of ER-stress and cytotoxic autophagy

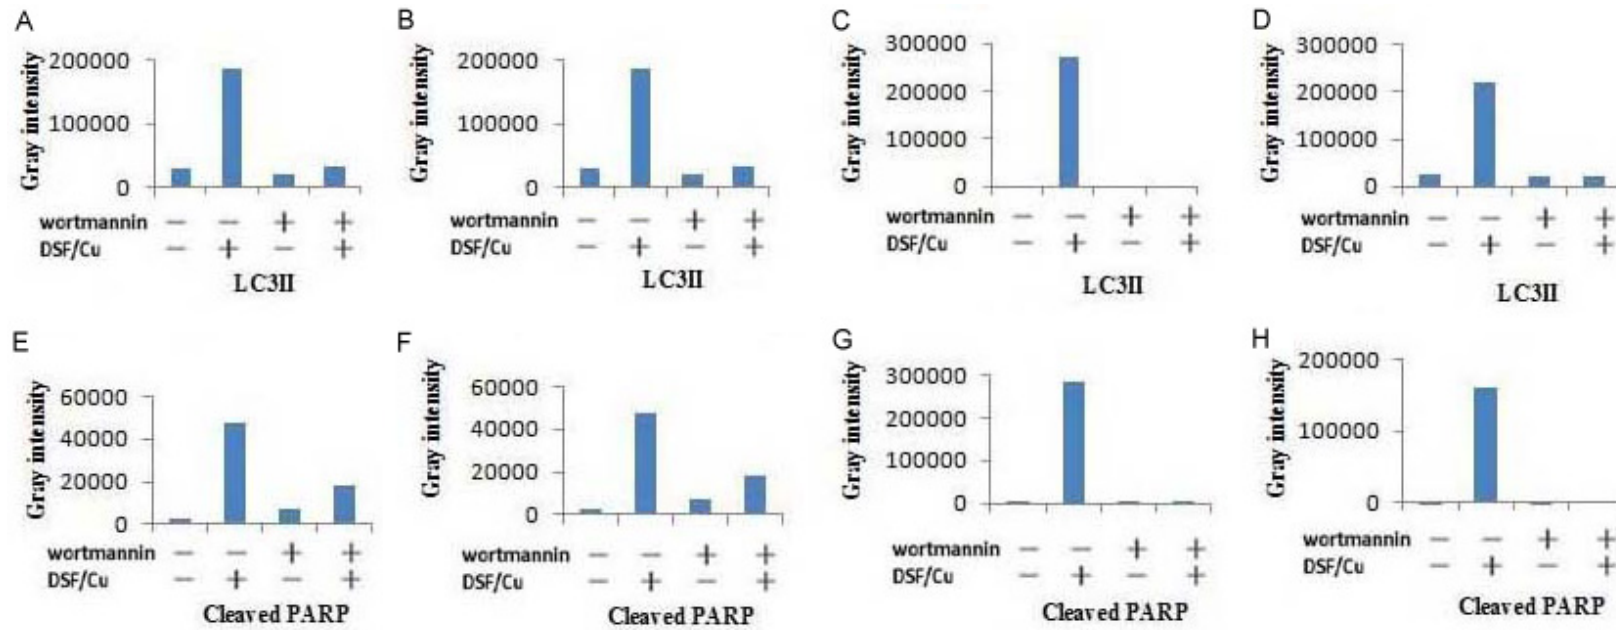

**Figure S2.** DSF/Cu induced apoptosis is autophagy dependent. The cell lines were pretreated with or without wortmannin for 6 hours. The cells were further treated with DSF/Cu for 24 hours. Treated cells were lysed and analyzed by Western blot for expression of cleaved PARP and LC3I/II. The mean gray intensity for LC3II (UACC-812 - A, MDA-MB-231 - B, PDAC6 - C and PANC-1 - D) and cleaved PARP (UACC-812 - E, MDA-MB-231 - F, PDAC6 - G and PANC-1 - H) were shown.

### Induction of ER-stress and cytotoxic autophagy

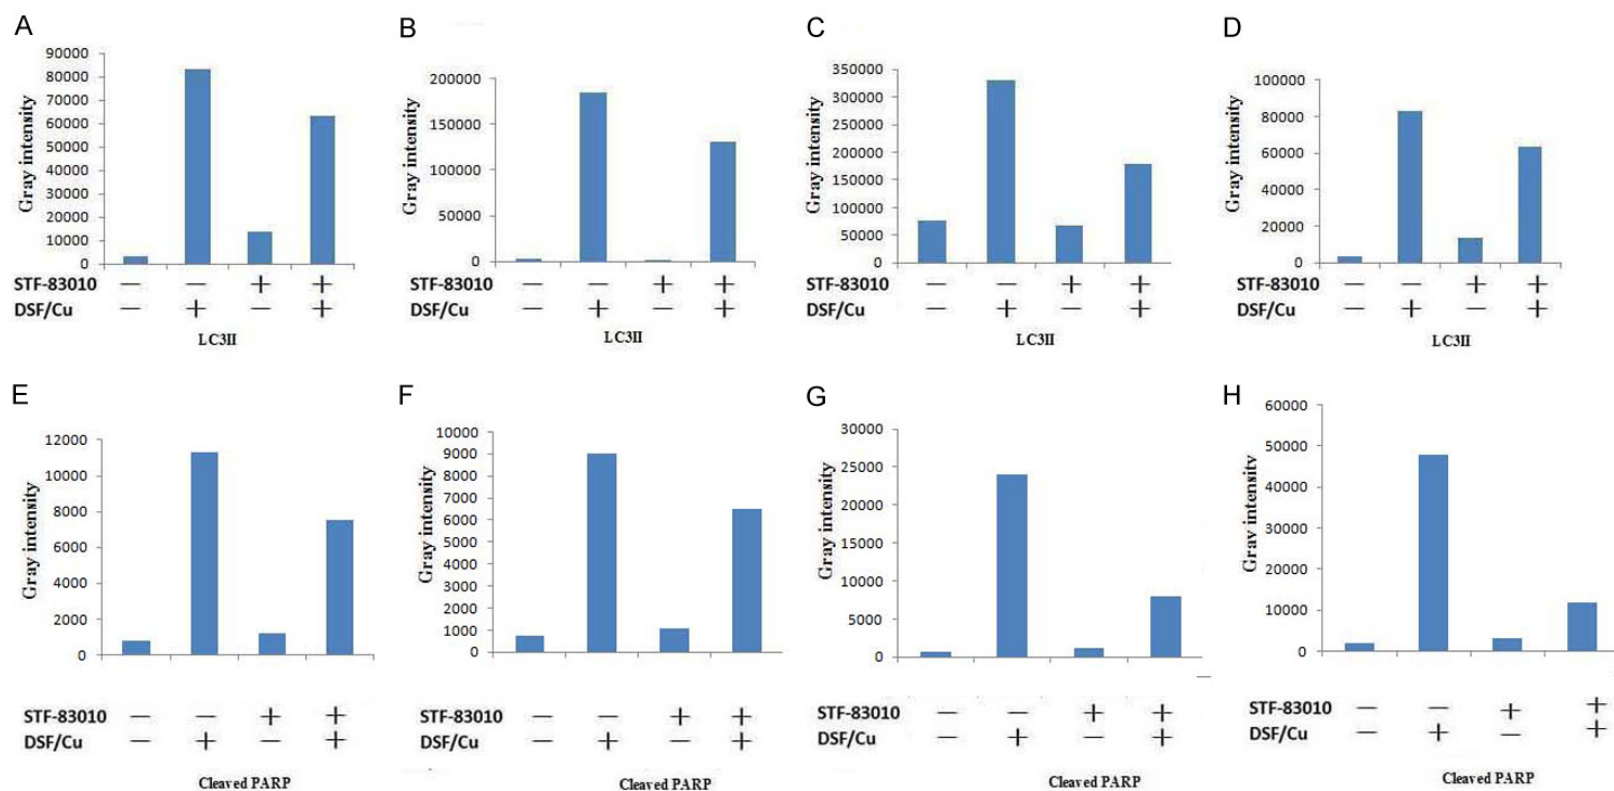

**Figure S3.** IRE1 $\alpha$  inhibitor reduces DSF/Cu-induced autophagy and cell death. The cell lines were pretreated with or without STF-083010 for 30 minutes and further treated with DSF/Cu for 24 hours. Treated cells were lysed and analyzed by Western blot for expression of cleaved PARP and LC3I/II. The mean gray intensity values for LC3II (UACC-812 - A, MDA-MB-231 - B, PDAC6 - C and PANC-1 - D) and cleaved PARP (UACC-812 - E, MDA-MB-231 - F, PDAC6 - G and PANC-1 - H) were shown.
